# Supplementary material
Source: MDPI journal article supplement (https://www.mdpi.com/1996-1073/13/23/6211)
Supplement: s1 [file s1]

House of municipal Energy

| Project: ArkESE<br>Municipality Name |                     |                 |                    |                      | Column #                          |             |                      |                 |                   |                          |                        |                   |              | Stakeholder Groups |                            | Objective Identification |         |     |     |     |     |     |
|--------------------------------------|---------------------|-----------------|--------------------|----------------------|-----------------------------------|-------------|----------------------|-----------------|-------------------|--------------------------|------------------------|-------------------|--------------|--------------------|----------------------------|--------------------------|---------|-----|-----|-----|-----|-----|
| Row #                                | Weighting Diagramme | Relative Weight | Stakeholder Weight | Total Identification | Objective                         | Stakeholder | Social               |                 |                   |                          |                        |                   |              |                    |                            | Column #                 | Comment |     |     |     |     |     |
|                                      |                     |                 |                    |                      |                                   |             | Public Participation | Regionalization | Climate Education | Environmental Protection | Technology Development | Local Added Value | Independence | Image Improvement  | Organization and Structure |                          |         |     |     |     |     |     |
| 1                                    |                     | 24%             | 196                | 673                  | Public Sector (19)                |             |                      |                 |                   |                          |                        |                   |              | 1                  |                            |                          |         |     |     |     |     |     |
| 2                                    |                     | 2%              | 18                 | 57                   |                                   |             | 9                    | 9               | 3                 | 3                        | 3                      | 9                 | 9            | 9                  | 3                          | 2                        |         |     |     |     |     |     |
| 3                                    |                     | 2%              | 16                 | 47                   |                                   |             | 9                    | 9               | 9                 | 3                        | 1                      | 3                 | 3            | 9                  | 1                          | 3                        |         |     |     |     |     |     |
| 4                                    |                     | 1%              | 10                 | 45                   |                                   |             | 3                    | 3               | 9                 | 3                        | 3                      | 9                 | 3            | 3                  | 9                          | 4                        |         |     |     |     |     |     |
| 5                                    |                     | 1%              | 7                  | 21                   |                                   |             | 3                    | 1               | 3                 | 3                        | 1                      | 3                 | 3            | 3                  | 1                          | 5                        |         |     |     |     |     |     |
| 6                                    |                     | 1%              | 7                  | 21                   |                                   |             | 3                    | 1               | 3                 | 3                        | 1                      | 3                 | 3            | 3                  | 1                          | 6                        |         |     |     |     |     |     |
| 7                                    |                     | 1%              | 9                  | 21                   |                                   |             | 3                    | 1               | 3                 | 3                        | 1                      | 3                 | 3            | 3                  | 1                          | 7                        |         |     |     |     |     |     |
| 8                                    |                     | 1%              | 9                  | 51                   |                                   |             | 3                    | 9               | 3                 | 3                        | 9                      | 3                 | 3            | 9                  | 9                          | 8                        |         |     |     |     |     |     |
| 9                                    |                     | 1%              | 10                 | 45                   |                                   |             | 3                    | 3               | 9                 | 3                        | 3                      | 9                 | 3            | 3                  | 9                          | 9                        |         |     |     |     |     |     |
| 10                                   |                     | 1%              | 7                  | 21                   |                                   |             | 3                    | 1               | 3                 | 3                        | 1                      | 3                 | 3            | 3                  | 1                          | 10                       |         |     |     |     |     |     |
| 11                                   |                     | 1%              | 7                  | 21                   |                                   |             | 3                    | 1               | 3                 | 3                        | 1                      | 3                 | 3            | 3                  | 1                          | 11                       |         |     |     |     |     |     |
| 12                                   |                     | 1%              | 9                  | 21                   |                                   |             | 3                    | 1               | 3                 | 3                        | 1                      | 3                 | 3            | 3                  | 1                          | 12                       |         |     |     |     |     |     |
| 13                                   |                     | 1%              | 12                 | 41                   |                                   |             | 1                    | 9               | 3                 | 3                        | 9                      | 3                 | 1            | 3                  | 9                          | 13                       |         |     |     |     |     |     |
| 14                                   |                     | 1%              | 9                  | 31                   |                                   |             | 3                    | 9               | 3                 | 3                        | 3                      | 3                 | 1            | 3                  | 3                          | 14                       |         |     |     |     |     |     |
| 15                                   |                     | 1%              | 12                 | 43                   |                                   |             | 1                    | 9               | 3                 | 3                        | 9                      | 3                 | 3            | 3                  | 9                          | 15                       |         |     |     |     |     |     |
| 16                                   |                     | 1%              | 9                  | 31                   |                                   |             | 3                    | 9               | 3                 | 3                        | 3                      | 3                 | 1            | 3                  | 3                          | 16                       |         |     |     |     |     |     |
| 17                                   |                     | 1%              | 12                 | 43                   |                                   |             | 1                    | 9               | 3                 | 3                        | 9                      | 3                 | 3            | 3                  | 9                          | 17                       |         |     |     |     |     |     |
| 18                                   |                     | 2%              | 13                 | 47                   |                                   |             | 9                    | 9               | 1                 | 9                        | 3                      | 3                 | 3            | 9                  | 1                          | 18                       |         |     |     |     |     |     |
| 19                                   |                     | 1%              | 10                 | 33                   |                                   |             | 3                    | 3               | 3                 | 3                        | 3                      | 3                 | 3            | 3                  | 9                          | 19                       |         |     |     |     |     |     |
| 20                                   |                     | 1%              | 10                 | 33                   |                                   |             | 3                    | 3               | 3                 | 3                        | 3                      | 3                 | 3            | 9                  | 3                          | 20                       |         |     |     |     |     |     |
| 21                                   |                     | 10%             | 84                 | 305                  | Private Persons (9)               |             |                      |                 |                   |                          |                        |                   |              | 21                 |                            |                          |         |     |     |     |     |     |
| 22                                   |                     | 2%              | 16                 | 49                   |                                   |             | 9                    | 9               | 3                 | 9                        | 3                      | 9                 | 3            | 3                  | 1                          | 22                       |         |     |     |     |     |     |
| 23                                   |                     | 1%              | 12                 | 43                   |                                   |             | 3                    | 9               | 3                 | 9                        | 3                      | 9                 | 3            | 3                  | 1                          | 23                       |         |     |     |     |     |     |
| 24                                   |                     | 2%              | 15                 | 49                   |                                   |             | 9                    | 9               | 3                 | 9                        | 3                      | 9                 | 3            | 3                  | 1                          | 24                       |         |     |     |     |     |     |
| 25                                   |                     | 1%              | 10                 | 35                   |                                   |             | 1                    | 3               | 1                 | 3                        | 9                      | 9                 | 3            | 3                  | 3                          | 25                       |         |     |     |     |     |     |
| 26                                   |                     | 1%              | 9                  | 35                   |                                   |             | 9                    | 3               | 9                 | 3                        | 3                      | 3                 | 3            | 1                  | 1                          | 26                       |         |     |     |     |     |     |
| 27                                   |                     | 0%              | 4                  | 20                   |                                   |             | 3                    | 3               | 3                 | 1                        | 3                      | 3                 | 1            | 0                  | 27                         |                          |         |     |     |     |     |     |
| 28                                   |                     | 1%              | 6                  | 17                   |                                   |             | 1                    | 1               | 1                 | 3                        | 3                      | 3                 | 3            | 1                  | 1                          | 28                       |         |     |     |     |     |     |
| 29                                   |                     | 0%              | 3                  | 23                   |                                   |             | 9                    | 1               | 1                 | 1                        | 3                      | 3                 | 3            | 1                  | 1                          | 29                       |         |     |     |     |     |     |
| 30                                   |                     | 1%              | 9                  | 34                   |                                   |             | 3                    | 3               | 3                 | 3                        | 9                      | 1                 | 9            | 3                  | 0                          | 30                       |         |     |     |     |     |     |
| 31                                   |                     | 15%             | 128                | 470                  | Public Utility (13)               |             |                      |                 |                   |                          |                        |                   |              | 31                 |                            |                          |         |     |     |     |     |     |
| 32                                   |                     | 2%              | 18                 | 63                   |                                   |             | 3                    | 9               | 9                 | 9                        | 9                      | 9                 | 3            | 9                  | 3                          | 32                       |         |     |     |     |     |     |
| 33                                   |                     | 1%              | 11                 | 31                   |                                   |             | 3                    | 3               | 1                 | 3                        | 9                      | 3                 | 3            | 3                  | 3                          | 33                       |         |     |     |     |     |     |
| 34                                   |                     | 2%              | 16                 | 63                   |                                   |             | 3                    | 9               | 9                 | 9                        | 9                      | 9                 | 3            | 9                  | 3                          | 34                       |         |     |     |     |     |     |
| 35                                   |                     | 1%              | 12                 | 51                   |                                   |             | 9                    | 9               | 3                 | 3                        | 9                      | 9                 | 3            | 3                  | 3                          | 35                       |         |     |     |     |     |     |
| 36                                   |                     | 0%              | 4                  | 25                   |                                   |             | 3                    | 3               | 1                 | 3                        | 3                      | 3                 | 3            | 3                  | 3                          | 36                       |         |     |     |     |     |     |
| 37                                   |                     | 0%              | 4                  | 25                   |                                   |             | 3                    | 3               | 1                 | 3                        | 3                      | 3                 | 3            | 3                  | 3                          | 37                       |         |     |     |     |     |     |
| 38                                   |                     | 1%              | 10                 | 41                   |                                   |             | 1                    | 9               | 3                 | 3                        | 9                      | 9                 | 3            | 3                  | 1                          | 38                       |         |     |     |     |     |     |
| 39                                   |                     | 2%              | 14                 | 46                   |                                   |             | 9                    | 9               | 1                 | 9                        | 3                      | 9                 | 3            | 3                  | 0                          | 39                       |         |     |     |     |     |     |
| 40                                   |                     | 1%              | 11                 | 23                   |                                   |             | 1                    | 3               | 1                 | 3                        | 3                      | 3                 | 3            | 3                  | 3                          | 40                       |         |     |     |     |     |     |
| 41                                   |                     | 1%              | 5                  | 23                   |                                   |             | 1                    | 3               | 1                 | 3                        | 3                      | 3                 | 3            | 3                  | 3                          | 41                       |         |     |     |     |     |     |
| 42                                   |                     | 0%              | 4                  | 23                   |                                   |             | 1                    | 3               | 1                 | 3                        | 3                      | 3                 | 3            | 3                  | 3                          | 42                       |         |     |     |     |     |     |
| 43                                   |                     | 1%              | 9                  | 23                   |                                   |             | 1                    | 3               | 1                 | 3                        | 9                      | 1                 | 1            | 3                  | 1                          | 43                       |         |     |     |     |     |     |
| 44                                   |                     | 1%              | 10                 | 33                   |                                   |             | 1                    | 9               | 1                 | 9                        | 3                      | 3                 | 3            | 3                  | 1                          | 44                       |         |     |     |     |     |     |
| 45                                   |                     | 11%             | 95                 | 354                  | Research and Education (9)        |             |                      |                 |                   |                          |                        |                   |              | 45                 |                            |                          |         |     |     |     |     |     |
| 46                                   |                     | 1%              | 10                 | 37                   |                                   |             | 1                    | 9               | 9                 | 3                        | 1                      | 1                 | 1            | 9                  | 3                          | 46                       |         |     |     |     |     |     |
| 47                                   |                     | 2%              | 16                 | 45                   |                                   |             | 3                    | 3               | 9                 | 9                        | 3                      | 3                 | 3            | 9                  | 3                          | 47                       |         |     |     |     |     |     |
| 48                                   |                     | 2%              | 13                 | 45                   |                                   |             | 3                    | 3               | 3                 | 3                        | 9                      | 3                 | 9            | 9                  | 3                          | 48                       |         |     |     |     |     |     |
| 49                                   |                     | 1%              | 10                 | 45                   |                                   |             | 3                    | 3               | 3                 | 3                        | 9                      | 3                 | 9            | 9                  | 3                          | 49                       |         |     |     |     |     |     |
| 50                                   |                     | 2%              | 14                 | 47                   |                                   |             | 9                    | 9               | 9                 | 3                        | 1                      | 1                 | 3            | 9                  | 3                          | 50                       |         |     |     |     |     |     |
| 51                                   |                     | 0%              | 4                  | 31                   |                                   |             | 1                    | 3               | 9                 | 3                        | 3                      | 3                 | 3            | 3                  | 3                          | 51                       |         |     |     |     |     |     |
| 52                                   |                     | 2%              | 15                 | 48                   |                                   |             | 3                    | 3               | 9                 | 9                        | 3                      | 3                 | 9            | 9                  | 0                          | 52                       |         |     |     |     |     |     |
| 53                                   |                     | 1%              | 9                  | 29                   |                                   |             | 3                    | 3               | 9                 | 3                        | 1                      | 3                 | 3            | 3                  | 1                          | 53                       |         |     |     |     |     |     |
| 54                                   |                     | 0%              | 4                  | 27                   |                                   |             | 3                    | 3               | 9                 | 3                        | 1                      | 3                 | 1            | 3                  | 1                          | 54                       |         |     |     |     |     |     |
| 55                                   |                     | 12%             | 99                 | 407                  | Trade, Commerce and Industry (16) |             |                      |                 |                   |                          |                        |                   |              | 55                 |                            |                          |         |     |     |     |     |     |
| 56                                   |                     | 0%              | 2                  | 15                   |                                   |             | 0                    | 3               | 0                 | 1                        | 3                      | 3                 | 1            | 3                  | 1                          | 56                       |         |     |     |     |     |     |
| 57                                   |                     | 0%              | 4                  | 18                   |                                   |             | 0                    | 3               | 1                 | 3                        | 3                      | 3                 | 3            | 1                  | 1                          | 57                       |         |     |     |     |     |     |
| 58                                   |                     | 1%              | 8                  | 33                   |                                   |             | 1                    | 9               | 1                 | 3                        | 9                      | 3                 | 1            | 3                  | 3                          | 58                       |         |     |     |     |     |     |
| 59                                   |                     | 1%              | 5                  | 33                   |                                   |             | 1                    | 9               | 1                 | 3                        | 9                      | 3                 | 1            | 3                  | 3                          | 59                       |         |     |     |     |     |     |
| 60                                   |                     | 1%              | 5                  | 33                   |                                   |             | 1                    | 9               | 1                 | 3                        | 9                      | 3                 | 1            | 3                  | 3                          | 60                       |         |     |     |     |     |     |
| 61                                   |                     | 1%              | 5                  | 33                   |                                   |             | 1                    | 9               | 1                 | 3                        | 9                      | 3                 | 1            | 3                  | 3                          | 61                       |         |     |     |     |     |     |
| 62                                   |                     | 1%              | 6                  | 34                   |                                   |             | 0                    | 3               | 1                 | 3                        | 9                      | 3                 | 3            | 9                  | 3                          | 62                       |         |     |     |     |     |     |
| 63                                   |                     | 1%              | 9                  | 34                   |                                   |             | 0                    | 3               | 1                 | 3                        | 9                      | 3                 | 3            | 9                  | 3                          | 63                       |         |     |     |     |     |     |
| 64                                   |                     | 0%              | 4                  | 17                   |                                   |             | 3                    | 3               | 0                 | 1                        | 3                      | 3                 | 1            | 3                  | 0                          | 64                       |         |     |     |     |     |     |
| 65                                   |                     | 1%              | 11                 | 31                   |                                   |             | 1                    | 3               | 1                 | 9                        | 9                      | 3                 | 1            | 3                  | 1                          | 65                       |         |     |     |     |     |     |
| 66                                   |                     | 1%              | 8                  | 19                   |                                   |             | 1                    | 3               | 1                 | 3                        | 1                      | 3                 | 3            | 3                  | 1                          | 66                       |         |     |     |     |     |     |
| 67                                   |                     | 1%              | 8                  | 19                   |                                   |             | 1                    | 3               | 1                 | 3                        | 1                      | 3                 | 3            | 3                  | 1                          | 67                       |         |     |     |     |     |     |
| 68                                   |                     | 1%              | 6                  | 19                   |                                   |             | 1                    | 3               | 1                 | 3                        | 1                      | 3                 | 3            | 3                  | 1                          | 68                       |         |     |     |     |     |     |
| 69                                   |                     | 0%              | 4                  | 22                   |                                   |             | 1                    | 3               | 3                 | 3                        | 3                      | 3                 | 3            | 3                  | 0                          | 69                       |         |     |     |     |     |     |
| 70                                   |                     | 1%              | 7                  | 25                   |                                   |             | 3                    | 3               | 3                 | 3                        | 3                      | 3                 | 3            | 3                  | 1                          | 70                       |         |     |     |     |     |     |
| 71                                   |                     | 1%              | 7                  | 22                   |                                   |             | 1                    | 3               | 3                 | 3                        | 3                      | 3                 | 3            | 3                  | 0                          | 71                       |         |     |     |     |     |     |
| 72                                   |                     | 28%             | 231                | 759                  | Multipliers (25)                  |             |                      |                 |                   |                          |                        |                   |              | 72                 |                            |                          |         |     |     |     |     |     |
| 73                                   |                     | 1%              | 10                 | 30                   |                                   |             | 9                    | 3               | 1                 | 1                        | 0                      | 3                 | 3            | 9                  | 1                          | 73                       |         |     |     |     |     |     |
| 74                                   |                     | 1%              | 8                  | 21                   |                                   |             | 1                    | 3               | 1                 | 1                        | 3                      | 3                 | 3            | 3                  | 3                          | 74                       |         |     |     |     |     |     |
| 75                                   |                     | 1%              | 11                 | 26                   |                                   |             | 9                    | 3               | 1                 | 3                        | 1                      | 3                 | 3            | 3                  | 0                          | 75                       |         |     |     |     |     |     |
| 76                                   |                     | 1%              | 10                 | 41                   |                                   |             | 1                    | 9               | 3                 | 3                        | 1                      | 3                 | 9            | 9                  | 3                          | 76                       |         |     |     |     |     |     |
| 77                                   |                     | 1%              | 5                  | 41                   |                                   |             | 1                    | 9               | 3                 | 3                        | 1                      | 3                 | 9            | 9                  | 3                          | 77                       |         |     |     |     |     |     |
| 78                                   |                     | 1%              | 12                 | 43                   |                                   |             | 3                    | 9               | 3                 | 3                        | 1                      | 3                 | 9            | 9                  | 3                          | 78                       |         |     |     |     |     |     |
| 79                                   |                     | 1%              | 12                 | 43                   |                                   |             | 3                    | 9               | 3                 | 3                        | 1                      | 3                 | 9            | 9                  | 3                          | 79                       |         |     |     |     |     |     |
| 80                                   |                     | 1%              | 10                 | 33                   |                                   |             | 1                    | 9               | 3                 | 3                        | 1                      | 3                 | 3            | 9                  | 1                          | 80                       |         |     |     |     |     |     |
| 81                                   |                     | 2%              | 16                 | 33                   |                                   |             | 1                    | 9               | 3                 | 3                        | 1                      | 3                 | 3            | 9                  | 1                          | 81                       |         |     |     |     |     |     |
| 82                                   |                     | 1%              | 7                  | 19                   |                                   |             | 1                    | 3               | 3                 | 1                        | 1                      | 3                 | 1            | 3                  | 3                          | 82                       |         |     |     |     |     |     |
| 83                                   |                     | 2%              | 15                 | 43                   |                                   |             | 3                    | 9               | 3                 | 3                        | 3                      | 3                 | 9            | 9                  | 1                          | 83                       |         |     |     |     |     |     |
| 84                                   |                     | 0%              | 3                  | 25                   |                                   |             | 3                    | 3               | 3                 | 9                        | 0                      | 1                 | 3            | 3                  | 0                          | 84                       |         |     |     |     |     |     |
| 85                                   |                     | 1%              | 10                 | 23                   |                                   |             | 3                    | 3               | 3                 | 1                        | 3                      | 3                 | 1            | 3                  | 3                          | 85                       |         |     |     |     |     |     |
| 86                                   |                     | 1%              | 9                  | 23                   |                                   |             | 3                    | 3               | 3                 | 1                        | 3                      | 3                 | 1            | 3                  | 3                          | 86                       |         |     |     |     |     |     |
| 87                                   |                     | 0%              | 3                  | 23                   |                                   |             | 3                    | 3               | 3                 | 1                        | 3                      | 3                 | 1            | 3                  | 3                          | 87                       |         |     |     |     |     |     |
| 88                                   |                     | 1%              | 10                 | 35                   |                                   |             | 9                    | 3               | 3                 | 9                        | 1                      | 3                 | 3            | 3                  | 1                          | 88                       |         |     |     |     |     |     |
| 89                                   |                     | 0%              | 3                  | 4                    |                                   |             | 1                    | 0               | 0                 | 0                        | 0                      | 0                 | 1            | 1                  | 1                          | 89                       |         |     |     |     |     |     |
| 90                                   |                     | 1%              | 7                  | 27                   |                                   |             | 1                    | 3               | 1                 | 3                        | 3                      | 9                 | 1            | 3                  | 3                          | 90                       |         |     |     |     |     |     |
| 91                                   |                     | 1%              | 7                  | 27                   |                                   |             | 1                    | 3               | 1                 | 3                        | 1                      | 3                 | 3            | 9                  | 3                          | 91                       |         |     |     |     |     |     |
| 92                                   |                     | 1%              | 9                  | 26                   |                                   |             | 9                    | 3               | 1                 | 3                        | 1                      | 3                 | 3            | 3                  | 0                          | 92                       |         |     |     |     |     |     |
| 93                                   |                     | 2%              | 15                 | 47                   |                                   |             | 3                    | 3               | 9                 | 9                        | 1                      | 9                 | 3            | 9                  | 1                          | 93                       |         |     |     |     |     |     |
| 94                                   |                     | 2%              | 14                 | 31                   |                                   |             | 3                    | 3               | 3                 | 3                        | 3                      | 3                 | 3            | 9                  | 1                          | 94                       |         |     |     |     |     |     |
| 95                                   |                     | 0%              | 3                  | 25                   |                                   |             | 1                    | 9               | 3                 | 1                        | 1                      | 3                 | 3            | 3                  | 1                          | 95                       |         |     |     |     |     |     |
| 96                                   |                     | 1%              | 10                 | 29                   |                                   |             | 1                    | 3               | 3                 | 9                        | 3                      | 3                 | 3            | 3                  | 1                          | 96                       |         |     |     |     |     |     |
| 97                                   |                     | 1%              | 12                 | 41                   |                                   |             | 9                    | 3               | 9                 | 3                        | 1                      | 3                 | 3            | 9                  | 1                          | 97                       |         |     |     |     |     |     |
| Σ                                    |                     | 100%            | 833                | 2968                 | Average Objective Identification  |             |                      |                 |                   |                          |                        |                   |              | 2,9                | 4,6                        | 3,0                      | 3,5     | 3,4 | 3,5 | 3,0 | 4,4 | 2,2 |
| 91 Stakeholder (insgesamt)           |                     |                 |                    |                      | Relevance Score                   |             |                      |                 |                   |                          |                        |                   |              | 359                | 547                        | 370                      | 424     | 384 | 420 | 354 | 531 | 243 |
|                                      |                     |                 |                    |                      | Relative Objective Weight         |             |                      |                 |                   |                          |                        |                   |              | 10%                | 15%                        | 10%                      | 12%     | 11% | 12% | 10% | 15% | 7%  |
|                                      |                     |                 |                    |                      | Weighting Diagramme               |             |                      |                 |                   |                          |                        |                   |              |                    |                            |                          |         |     |     |     |     |     |
|                                      |                     |                 |                    |                      | Column #                          |             |                      |                 |                   |                          |                        |                   |              | 1                  | 2                          | 3                        | 4       | 5   | 6   | 7   | 8   | 9   |
