# Supplementary material
Source: MDPI journal article supplement (https://www.mdpi.com/1996-1073/13/23/6211)
Supplement: s1 [file s1]

| Ziel / Unterziel / Kriterium |                                                     | Punkte / t |      | Gewichtung | Typ | Quelle | Wert                 | Nutzen | Wert                     | Nutzen | Wert                 | Nutzen | Wert                     | Nutzen |
|------------------------------|-----------------------------------------------------|------------|------|------------|-----|--------|----------------------|--------|--------------------------|--------|----------------------|--------|--------------------------|--------|
| A                            | Projektgewichtung                                   | Parameter  |      |            |     |        | 4 MW Anlage          |        | 4 MW Anlage + Acceptance |        | 1 MW Anlage          |        | 1 MW Anlage + Acceptance |        |
|                              | Bürgerbeteiligung                                   | 359        | 10%  | CALC       | B   |        | 0%                   | 0%     | 21%                      | 2%     | 0%                   | 0%     | 21%                      |        |
|                              | Regionalisierung                                    | 547        | 15%  | CALC       | C   |        | 18%                  | 3%     | 19%                      | 3%     | 18%                  | 3%     | 19%                      |        |
|                              | (Klima-)Bildung                                     | 370        | 10%  | CALC       | D   |        | 0%                   | 0%     | 23%                      | 2%     | 0%                   | 0%     | 23%                      |        |
|                              | Umweltschonung                                      | 424        | 12%  | CALC       | E   |        | 50%                  | 6%     | 50%                      | 6%     | 52%                  | 6%     | 52%                      |        |
|                              | Technologieentwicklung                              | 384        | 11%  | CALC       | F   |        | 24%                  | 3%     | 24%                      | 3%     | 24%                  | 3%     | 24%                      |        |
|                              | Wertschöpfung                                       | 420        | 12%  | CALC       | G   |        | 92%                  | 11%    | 92%                      | 11%    | 48%                  | 6%     | 48%                      |        |
|                              | Unabhängigkeit                                      | 354        | 10%  | CALC       | H   |        | 34%                  | 3%     | 34%                      | 3%     | 27%                  | 3%     | 28%                      |        |
|                              | Imageverbesserung                                   | 531        | 15%  | CALC       | I   |        | 0%                   | 0%     | 0%                       | 0%     | 0%                   | 0%     | 0%                       |        |
|                              | Organisation                                        | 243        | 7%   | CALC       | J   |        | 0%                   | 0%     | 0%                       | 0%     | 0%                   | 0%     | 0%                       |        |
|                              |                                                     | 3632       | 100% |            |     |        |                      | 25,00% |                          | 29%    |                      | 20%    |                          | 24%    |
| B                            | Bürgerbeteiligung                                   |            |      |            |     |        |                      | 0%     |                          | 21%    |                      | 0%     |                          | 21%    |
|                              | 1 Bürgerstiftung                                    | 2          | 13%  | VAL        | B16 |        | FALSCH               | 0%     | FALSCH                   | 0%     | FALSCH               | 0%     | FALSCH                   |        |
|                              | 2 Bürgerprojektbeteiligung                          | 8          | 50%  | CALC       | B1  |        | 0%                   | 0%     | 17%                      | 9%     | 0%                   | 0%     | 17%                      |        |
|                              | 3 Öffentlichkeitsarbeit                             | 6          | 38%  | CALC       | B2  |        | 0%                   | 0%     | 32%                      | 12%    | 0%                   | 0%     | 32%                      |        |
|                              | 4 Rechtsform des Betreibers                         | 2          | 13%  | CALC       | B3  |        | 0%                   | 0%     | 0%                       | 0%     | 0%                   | 0%     | 0%                       |        |
|                              |                                                     | 16         | 100% |            |     |        |                      | 0%     |                          | 21%    |                      | 0%     |                          | 21%    |
| B1                           | Bürgerprojektbeteiligung                            |            |      |            |     |        |                      | 0%     |                          | 17%    |                      | 0%     |                          | 17%    |
|                              | 1 Information                                       | 8          | 31%  | CALC       | B11 |        | 0%                   | 0%     | 44%                      | 14%    | 0%                   | 0%     | 44%                      |        |
|                              | 2 Dialog                                            | 6          | 23%  | CALC       | B12 |        | 0%                   | 0%     | 0%                       | 0%     | 0%                   | 0%     | 0%                       |        |
|                              | 3 Mitbestimmung                                     | 4          | 15%  | CALC       | B13 |        | 0%                   | 0%     | 23%                      | 4%     | 0%                   | 0%     | 23%                      |        |
|                              | 4 Direkte finanzielle Beteiligung                   | 6          | 23%  | CALC       | B14 |        | 0%                   | 0%     | 0%                       | 0%     | 0%                   | 0%     | 0%                       |        |
|                              | 5 Passive finanzielle Beteiligung                   | 2          | 8%   | CALC       | B15 |        | 0%                   | 0%     | 0%                       | 0%     | 0%                   | 0%     | 0%                       |        |
|                              |                                                     | 26         | 100% |            |     |        |                      | 0%     |                          | 17%    |                      | 0%     |                          | 17%    |
| B11                          | Information                                         |            |      |            |     |        |                      | 0%     |                          | 44%    |                      | 0%     |                          | 44%    |
|                              | 1 Projektwebsite                                    | 3          | 17%  | VAL        | B32 |        | FALSCH               | 0%     | WAHR                     | 17%    | FALSCH               | 0%     | WAHR                     |        |
|                              | 2 Soziale Medien                                    | 3          | 17%  | VAL        | B33 |        | FALSCH               | 0%     | FALSCH                   | 0%     | FALSCH               | 0%     | FALSCH                   |        |
|                              | 3 Besichtigungen                                    | 3          | 17%  | VAL        | B36 |        | FALSCH               | 0%     | WAHR                     | 17%    | FALSCH               | 0%     | WAHR                     |        |
|                              | 4 Projektbezogene Veranstaltungen                   | 3          | 17%  | VAL        | B27 |        | FALSCH               | 0%     | FALSCH                   | 0%     | FALSCH               | 0%     | FALSCH                   |        |
|                              | 5 Infotafeln                                        | 2          | 11%  | VAL        | B31 |        | FALSCH               | 0%     | WAHR                     | 11%    | FALSCH               | 0%     | WAHR                     |        |
|                              | 6 Lokale Presse                                     | 4          | 22%  | VAL        | B37 |        | FALSCH               | 0%     | FALSCH                   | 0%     | FALSCH               | 0%     | FALSCH                   |        |
|                              |                                                     | 18         | 100% |            |     |        |                      | 0%     |                          | 44%    |                      | 0%     |                          | 44%    |
| B12                          | Dialog                                              |            |      |            |     |        |                      | 0%     |                          | 0%     |                      | 0%     |                          | 0%     |
|                              | Umfragen                                            | 3          | 16%  | VAL        | B22 |        | FALSCH               | 0%     | FALSCH                   | 0%     | FALSCH               | 0%     | FALSCH                   |        |
|                              | Fragestunden                                        | 3          | 16%  | VAL        | B35 |        | FALSCH               | 0%     | FALSCH                   | 0%     | FALSCH               | 0%     | FALSCH                   |        |
|                              | Podiumsdiskussionen                                 | 4          | 21%  | VAL        | B19 |        | FALSCH               | 0%     | FALSCH                   | 0%     | FALSCH               | 0%     | FALSCH                   |        |
|                              | Runder Tisch                                        | 2          | 11%  | VAL        | B20 |        | FALSCH               | 0%     | FALSCH                   | 0%     | FALSCH               | 0%     | FALSCH                   |        |
|                              | Stammtische                                         | 3          | 16%  | VAL        | B21 |        | FALSCH               | 0%     | FALSCH                   | 0%     | FALSCH               | 0%     | FALSCH                   |        |
|                              | Ansprechpartner                                     | 4          | 21%  | VAL        | B34 |        | FALSCH               | 0%     | FALSCH                   | 0%     | FALSCH               | 0%     | FALSCH                   |        |
|                              |                                                     | 19         | 100% |            |     |        |                      | 0%     |                          | 0%     |                      | 0%     |                          | 0%     |
| B13                          | Mitbestimmung                                       |            |      |            |     |        |                      | 0%     |                          | 23%    |                      | 0%     |                          | 23%    |
|                              | Zukunftswerkstatt                                   | 2          | 15%  | VAL        | B23 |        | FALSCH               | 0%     | FALSCH                   | 0%     | FALSCH               | 0%     | FALSCH                   |        |
|                              | Bürgergutachten                                     | 3          | 23%  | VAL        | B24 |        | FALSCH               | 0%     | WAHR                     | 23%    | FALSCH               | 0%     | WAHR                     |        |
|                              | Mediation                                           | 2          | 15%  | VAL        | B25 |        | FALSCH               | 0%     | FALSCH                   | 0%     | FALSCH               | 0%     | FALSCH                   |        |
|                              | Petition                                            | 3          | 23%  | VAL        | B26 |        | FALSCH               | 0%     | FALSCH                   | 0%     | FALSCH               | 0%     | FALSCH                   |        |
|                              | Podiumsdiskussion                                   | 3          | 23%  | VAL        | B19 |        | FALSCH               | 0%     | FALSCH                   | 0%     | FALSCH               | 0%     | FALSCH                   |        |
|                              |                                                     | 13         | 100% |            |     |        |                      | 0%     |                          | 23%    |                      | 0%     |                          | 23%    |
| B14                          | Direkte finanzielle Beteiligung                     |            |      |            |     |        |                      | 0%     |                          | 0%     |                      | 0%     |                          | 0%     |
|                              | Beteiligung am Eigenkapital der Projektgesellschaft | 4          | 25%  | VAL        | B14 |        | FALSCH               | 0%     | FALSCH                   | 0%     | FALSCH               | 0%     | FALSCH                   |        |
|                              | Sparbriefe                                          | 3          | 19%  | VAL        | B15 |        | FALSCH               | 0%     | FALSCH                   | 0%     | FALSCH               | 0%     | FALSCH                   |        |
|                              | Nachrangdarlehen                                    | 3          | 19%  | VAL        | B10 |        | FALSCH               | 0%     | FALSCH                   | 0%     | FALSCH               | 0%     | FALSCH                   |        |
|                              | Stille Beteiligung                                  | 3          | 19%  | VAL        | B11 |        | FALSCH               | 0%     | FALSCH                   | 0%     | FALSCH               | 0%     | FALSCH                   |        |
|                              | Inhaberschuldverschreibung                          | 3          | 19%  | VAL        | B12 |        | FALSCH               | 0%     | FALSCH                   | 0%     | FALSCH               | 0%     | FALSCH                   |        |
|                              |                                                     | 16         | 100% |            |     |        |                      | 0%     |                          | 0%     |                      | 0%     |                          | 0%     |
| B15                          | Passive finanzielle Beteiligung                     |            |      |            |     |        |                      | 0%     |                          | 0%     |                      | 0%     |                          | 0%     |
|                              | Direkte Flächenpacht                                | 4          | 27%  | VAL        | B13 |        | FALSCH               | 0%     | FALSCH                   | 0%     | FALSCH               | 0%     | FALSCH                   |        |
|                              | Aufgeteilte Pacht innerhalb eines Radius            | 4          | 27%  | VAL        | B9  |        | FALSCH               | 0%     | FALSCH                   | 0%     | FALSCH               | 0%     | FALSCH                   |        |
|                              | Anwohnerstrom                                       | 3          | 20%  | VAL        | B8  |        | FALSCH               | 0%     | FALSCH                   | 0%     | FALSCH               | 0%     | FALSCH                   |        |
|                              | Bürgerstiftung                                      | 4          | 27%  | VAL        | B16 |        | FALSCH               | 0%     | FALSCH                   | 0%     | FALSCH               | 0%     | FALSCH                   |        |
|                              |                                                     | 15         | 100% |            |     |        |                      | 0%     |                          | 0%     |                      | 0%     |                          | 0%     |
| B2                           | Öffentlichkeitsarbeit                               |            |      |            |     |        |                      | 0%     |                          | 32%    |                      | 0%     |                          | 32%    |
|                              | Zielgruppenspezifische Ansprachen                   | 2          | 9%   | VAL        | B38 |        | FALSCH               | 0%     | FALSCH                   | 0%     | FALSCH               | 0%     | FALSCH                   |        |
|                              | Zeitungen/Informationsschriften                     | 5          | 23%  | VAL        | B30 |        | FALSCH               | 0%     | WAHR                     | 23%    | FALSCH               | 0%     | WAHR                     |        |
|                              | Mundpropaganda                                      | 4          | 18%  | VAL        | B39 |        | FALSCH               | 0%     | FALSCH                   | 0%     | FALSCH               | 0%     | FALSCH                   |        |
|                              | Kopplung mit anderen Informationsveranstaltungen    | 4          | 18%  | VAL        | B29 |        | FALSCH               | 0%     | FALSCH                   | 0%     | FALSCH               | 0%     | FALSCH                   |        |
|                              | Einbeziehung von Multiplikatoren                    | 5          | 23%  | VAL        | B40 |        | FALSCH               | 0%     | FALSCH                   | 0%     | FALSCH               | 0%     | FALSCH                   |        |
|                              | Anlagenbesichtigungen                               | 2          | 9%   | VAL        | B36 |        | FALSCH               | 0%     | WAHR                     | 9%     | FALSCH               | 0%     | WAHR                     |        |
|                              |                                                     | 22         | 100% |            |     |        |                      | 0%     |                          | 32%    |                      | 0%     |                          | 32%    |
| B3                           | Rechtsform                                          |            |      |            |     |        |                      | 0%     |                          | 0%     |                      | 0%     |                          | 0%     |
|                              | keine Angabe                                        | 0          | 0%   |            |     |        |                      |        |                          |        |                      |        |                          |        |
|                              | AG                                                  | 1          | 10%  |            |     |        |                      |        |                          |        |                      |        |                          |        |
|                              | GmbH                                                | 3          | 30%  |            |     |        |                      |        |                          |        |                      |        |                          |        |
|                              | UG                                                  | 3          | 30%  |            |     |        |                      |        |                          |        |                      |        |                          |        |
|                              | GbR                                                 | 3          | 30%  |            |     |        |                      |        |                          |        |                      |        |                          |        |
|                              | Einzelfirma                                         | 6          | 60%  |            |     |        |                      |        |                          |        |                      |        |                          |        |
|                              | e.V.                                                | 10         | 100% |            |     |        |                      |        |                          |        |                      |        |                          |        |
|                              | GmbH & Co KG                                        | 3          | 30%  |            |     |        |                      |        |                          |        |                      |        |                          |        |
|                              | EG                                                  | 10         | 100% |            |     |        |                      |        |                          |        |                      |        |                          |        |
|                              |                                                     |            |      | VAL        | B17 |        | keine Angabe         | 0%     | keine Angabe             | 0%     | keine Angabe         | 0%     | keine Angabe             | 0%     |
| C                            | Regionalisierung                                    |            |      |            |     |        |                      | 18%    |                          | 19%    |                      | 18%    |                          | 19%    |
|                              | Vermarktungsform                                    | 3          | 12%  | CALC       | C3  |        | 20%                  | 2%     | 20%                      | 2%     | 20%                  | 2%     | 20%                      |        |
|                              | Rekommunalisiert                                    | 4          | 16%  | VAL        | D8  |        | FALSCH               | 0%     | FALSCH                   | 0%     | FALSCH               | 0%     | FALSCH                   |        |
|                              | Lokale Finanzierung                                 | 4          | 16%  | CALC       | C2  |        | 100%                 | 16%    | 100%                     | 16%    | 100%                 | 16%    | 100%                     |        |
|                              | Regionale Wertschöpfung                             | 6          | 24%  |            |     |        | 0%                   | 0%     | 0%                       | 0%     | 0%                   | 0%     | 0%                       |        |
|                              | Rechtsform des Betreibers                           | 3          | 12%  | CALC       | C4  |        | 0%                   | 0%     | 0%                       | 0%     | 0%                   | 0%     | 0%                       |        |
|                              | Bürgerprojektbeteiligung                            | 5          | 20%  | CALC       | C1  |        | 0%                   | 0%     | 3%                       | 1%     | 0%                   | 0%     | 3%                       |        |
|                              |                                                     | 25         | 100% |            |     |        |                      | 18%    |                          | 19%    |                      | 18%    |                          | 19%    |
| C1                           | Bürgerprojektbeteiligung                            |            |      |            |     |        |                      | 0%     |                          | 3%     |                      | 0%     |                          | 3%     |
|                              | Information                                         | 1          | 5%   | CALC       | B11 |        | 0%                   | 0%     | 44%                      | 2%     | 0%                   | 0%     | 44%                      |        |
|                              | Dialog                                              | 1          | 5%   | CALC       | B12 |        | 0%                   | 0%     | 0%                       | 0%     | 0%                   | 0%     | 0%                       |        |
|                              | Mitbestimmung                                       | 1          | 5%   | CALC       | B13 |        | 0%                   | 0%     | 23%                      | 1%     | 0%                   | 0%     | 23%                      |        |
|                              | Direkte finanzielle Beteiligung                     | 10         | 48%  | CALC       | B14 |        | 0%                   | 0%     | 0%                       | 0%     | 0%                   | 0%     | 0%                       |        |
|                              | Passive finanzielle Beteiligung                     | 8          | 38%  | CALC       | B15 |        | 0%                   | 0%     | 0%                       | 0%     | 0%                   | 0%     | 0%                       |        |
|                              |                                                     | 21         | 100% |            |     |        |                      | 0%     |                          | 3%     |                      | 0%     |                          | 3%     |
| C2                           | Lokale Finanzierung                                 |            |      |            |     |        |                      | 100%   |                          | 100%   |                      | 100%   |                          | 100%   |
|                              | 0 - 33                                              | 0          | 0%   |            |     |        |                      |        |                          |        |                      |        |                          |        |
|                              | 33 - 66                                             | 4          | 40%  |            |     |        |                      |        |                          |        |                      |        |                          |        |
|                              | 66 - 100                                            | 7          | 70%  |            |     |        |                      |        |                          |        |                      |        |                          |        |
|                              |                                                     | 10         | 100% |            |     |        |                      |        |                          |        |                      |        |                          |        |
|                              |                                                     |            |      | VAL        | D9  |        | 66 - 100             | 100%   | 66 - 100                 | 100%   | 66 - 100             | 100%   | 66 - 100                 | 100%   |
| C3                           | Vermarktungsform                                    |            |      |            |     |        |                      | 20%    |                          | 20%    |                      | 20%    |                          | 20%    |
|                              | Eigenbedarfsabdeckung                               | 10         | 100% |            |     |        |                      |        |                          |        |                      |        |                          |        |
|                              | Einspeisung nach EEG                                | 2          | 20%  |            |     |        |                      |        |                          |        |                      |        |                          |        |
|                              | Einspeisung nach EEG mit Regionalnachweisen         | 5          | 50%  |            |     |        |                      |        |                          |        |                      |        |                          |        |
|                              | Direktvermarktung                                   | 7          | 70%  |            |     |        |                      |        |                          |        |                      |        |                          |        |
|                              |                                                     |            |      | VAL        | D7  |        | Einspeisung nach EEG | 20%    | Einspeisung nach EEG     | 20%    | Einspeisung nach EEG | 20%    | Einspeisung nach EEG     | 20%    |
| C4                           | Rechtsform                                          |            |      |            |     |        |                      | 0%     |                          | 0%     |                      | 0%     |                          | 0%     |
|                              | keine Angabe                                        | 0          | 0%   |            |     |        |                      |        |                          |        |                      |        |                          |        |
|                              | AG                                                  | 1          | 10%  |            |     |        |                      |        |                          |        |                      |        |                          |        |
|                              | GmbH                                                | 4          | 40%  |            |     |        |                      |        |                          |        |                      |        |                          |        |
|                              | UG                                                  | 5          | 50%  |            |     |        |                      |        |                          |        |                      |        |                          |        |
|                              | GbR                                                 | 3          | 30%  |            |     |        |                      |        |                          |        |                      |        |                          |        |
|                              | Einzelfirma                                         | 3          | 30%  |            |     |        |                      |        |                          |        |                      |        |                          |        |
|                              | e.V.                                                | 6          | 60%  |            |     |        |                      |        |                          |        |                      |        |                          |        |
|                              | GmbH & Co KG                                        | 6          | 60%  |            |     |        |                      |        |                          |        |                      |        |                          |        |
|                              | eG                                                  | 10         | 100% |            |     |        |                      |        |                          |        |                      |        |                          |        |
|                              |                                                     |            |      | VAL        | D11 |        | keine Angabe         | 0%     | keine Angabe             | 0%     | keine Angabe         | 0%     | keine Angabe             | 0%     |
| D                            | (Klima-)Bildung                                     |            |      |            |     |        |                      | 0%     |                          | 23%    |                      | 0%     |                          | 23%    |
|                              | Einfluss auf Politik                                | 3          | 13%  |            |     |        | 0%                   | 0%     | 0%                       | 0%     | 0%                   | 0%     | 0%                       |        |
|                              | Transformation von Lern- und Lehrumgebung           | 7          | 30%  | CALC       | D1  |        | 0%                   | 0%     | 75%                      | 23%    | 0%                   | 0%     | 75%                      |        |
|                              | Beteiligung junger Menschen                         | 5          | 22%  | CALC       | D2  |        | 0%                   | 0%     | 0%                       | 0%     | 0%                   | 0%     | 0%                       |        |
|                              | Förderung nachhaltiger Entwicklung                  | 3          | 13%  |            |     |        | 0%                   | 0%     | 0%                       | 0%     | 0%                   | 0%     | 0%                       |        |
|                              | Einbeziehung von Multiplikatoren                    | 5          | 22%  | CALC       | D3  |        | 0%                   | 0%     | 0%                       | 0%     | 0%                   | 0%     | 0%                       |        |
|                              |                                                     | 23         | 100% |            |     |        |                      | 0%     |                          | 23%    |                      | 0%     |                          | 23%    |
| D1                           | Transformation von Lern- und Lehrumgebung           |            |      |            |     |        |                      | 0%     |                          | 75%    |                      | 0%     |                          | 75%    |
|                              | Besichtigung                                        | 2          | 25%  | VAL        | F8  |        | FALSCH               | 0%     | WAHR                     | 25%    | FALSCH               | 0%     | WAHR                     |        |
|                              | Infozentrum/Infotafeln                              | 2          | 25%  | VAL        | F9  |        | FALSCH               | 0%     | WAHR                     | 25%    | FALSCH               | 0%     | WAHR                     |        |
|                              | Führungen                                           | 2          | 25%  | VAL        | F8  |        | FALSCH               | 0%     | WAHR                     | 25%    | FALSCH               | 0%     | WAHR                     |        |
|                              | Onlinemonitoring                                    | 2          | 25%  | VAL        | F11 |        | FALSCH               | 0%     | FALSCH                   | 0%     | FALSCH               | 0%     | FALSCH                   |        |
|                              |                                                     | 8          | 100% |            |     |        |                      | 0%     |                          | 75%    |                      | 0%     |                          | 75%    |
| D2                           | Beteiligung junger Menschen                         |            |      |            |     |        |                      | 0%     |                          | 0%     |                      | 0%     |                          | 0%     |
|                              | Projektgruppe/AG                                    | 5          | 50%  | VAL        | F18 |        | FALSCH               | 0%     | FALSCH                   | 0%     | FALSCH               | 0%     | FALSCH                   |        |
|                              | Verknüpfung mit Bildungseinrichtung                 | 5          | 50%  | VAL        | F14 |        | FALSCH               | 0%     | FALSCH                   | 0%     | FALSCH               | 0%     | FALSCH                   |        |
|                              |                                                     | 10         | 100% |            |     |        |                      | 0%     |                          | 0%     |                      | 0%     |                          | 0%     |
| D3                           | Einbeziehung von Multiplikatoren                    |            |      |            |     |        |                      | 0%     |                          | 0%     |                      | 0%     |                          | 0%     |
|                              | Politik                                             | 5          | 25%  |            |     |        | 0%                   | 0%     | 0%                       | 0%     | 0%                   | 0%     | 0%                       |        |
|                              | Vereine                                             | 5          | 25%  | VAL        | F15 |        | FALSCH               | 0%     | FALSCH                   | 0%     | FALSCH               | 0%     | FALSCH                   |        |
|                              | Multiplikatoren                                     | 5          | 25%  |            |     |        | 0%                   | 0%     | 0%                       | 0%     | 0%                   | 0%     | 0%                       |        |
|                              | Presse                                              | 5          | 25%  | VAL        | F17 |        | FALSCH               | 0%     | FALSCH                   | 0%     | FALSCH               | 0%     | FALSCH                   |        |
|                              |                                                     | 384        | 100% |            |     |        |                      | 0%     |                          | 0%     |                      | 0%     |                          | 0%     |
| E                            | Umweltschonung                                      |            |      |            |     |        |                      | 50%    |                          | 50%    |                      | 52%    |                          | 52%    |
|                              | Primärenergieaufwendung                             | 3          | 16%  | SPEC       |     |        | 87%                  | 14%    | 87%                      | 14%    | 87%                  | 14%    | 87%                      |        |

|     |                                             |    |                  |         |                                     |                 |                                     |                 |                                     |                 |                                     |                 |
|-----|---------------------------------------------|----|------------------|---------|-------------------------------------|-----------------|-------------------------------------|-----------------|-------------------------------------|-----------------|-------------------------------------|-----------------|
|     | Treibhausgase                               | 6  | 32% SPEC         |         | 73%                                 | 23%             | 73%                                 | 23%             | 73%                                 | 23%             | 73%                                 | 23%             |
|     | Versauerung                                 | 3  | 16% SPEC         |         | -32%                                | -5%             | -32%                                | -5%             | -32%                                | -5%             | -32%                                | -5%             |
|     | Luftschadstoffe (SO2, Nox)                  | 2  | 11% SPEC         |         | -45%                                | -5%             | -45%                                | -5%             | -45%                                | -5%             | -45%                                | -5%             |
|     | Flächennutzung                              | 2  | 11% SPEC         |         | 80%                                 | 8%              | 80%                                 | 8%              | 100%                                | 11%             | 100%                                | 11%             |
|     | Weitere Umwelteffekte                       | 3  | 16% CALC         | E1      | 90%                                 | 14%             | 90%                                 | 14%             | 90%                                 | 14%             | 90%                                 | 14%             |
|     |                                             | 19 | 100%             |         | Biogasanlage Energiepflanzen Biogas | 50%             | Biogasanlage Energiepflanzen Biogas | 50%             | Biogasanlage Energiepflanzen Biogas | 52%             | Biogasanlage Energiepflanzen Biogas | 52%             |
| E1  | Weitere Umwelteffekte                       |    |                  |         | 90%                                 | 90%             | 90%                                 | 90%             | 90%                                 | 90%             | 90%                                 | 90%             |
|     | Herstellung                                 | 3  | 20% SPEC         |         | 90%                                 | 18%             | 90%                                 | 18%             | 90%                                 | 18%             | 90%                                 | 18%             |
|     | Normalbetrieb                               | 5  | 33% SPEC         |         | 90%                                 | 30%             | 90%                                 | 30%             | 90%                                 | 30%             | 90%                                 | 30%             |
|     | Störfall                                    | 4  | 27% SPEC         |         | 90%                                 | 24%             | 90%                                 | 24%             | 90%                                 | 24%             | 90%                                 | 24%             |
|     | Betriebsende                                | 3  | 20% SPEC         |         | 90%                                 | 18%             | 90%                                 | 18%             | 90%                                 | 18%             | 90%                                 | 18%             |
|     |                                             | 15 | 100%             |         | Biogasanlage Energiepflanzen Biogas | 90%             |
| F   | Technologieentwicklung                      |    |                  |         | 24%                                 | 24%             | 24%                                 | 24%             | 24%                                 | 24%             | 24%                                 | 24%             |
|     | Einzeltechnologie                           | 6  | 23% CALC         | F1      | 0%                                  | 0%              | 0%                                  | 0%              | 0%                                  | 0%              | 0%                                  | 0%              |
|     | Technisches System                          | 6  | 23% CALC         | F2      | 0%                                  | 0%              | 0%                                  | 0%              | 0%                                  | 0%              | 0%                                  | 0%              |
|     | Vermarktungsform                            | 4  | 15% CALC         | F3      | 30%                                 | 5%              | 30%                                 | 5%              | 30%                                 | 5%              | 30%                                 | 5%              |
|     | Geschäftsmodell                             | 4  | 15% CALC         | F4      | 50%                                 | 8%              | 50%                                 | 8%              | 50%                                 | 8%              | 50%                                 | 8%              |
|     | Betreiber bzw. Hersteller                   | 6  | 23% CALC         | F5      | 50%                                 | 12%             | 50%                                 | 12%             | 50%                                 | 12%             | 50%                                 | 12%             |
|     |                                             | 26 | 100%             |         | 24%                                 | 24%             | 24%                                 | 24%             | 24%                                 | 24%             | 24%                                 | 24%             |
| F1  | Einzeltechnologie                           |    |                  |         | 0%                                  | 0%              | 0%                                  | 0%              | 0%                                  | 0%              | 0%                                  | 0%              |
|     | Monokristalline Siliziumanlage              | 2  | 20% SPEC         |         | 0                                   | 0%              | 0                                   | 0%              | 0                                   | 0%              | 0                                   | 0%              |
|     | Multikristalline Siliziumanlage             | 2  | 20% SPEC         |         | 0                                   | 0%              | 0                                   | 0%              | 0                                   | 0%              | 0                                   | 0%              |
|     | CIGS Solaranlage                            | 3  | 30% SPEC         |         | 0                                   | 0%              | 0                                   | 0%              | 0                                   | 0%              | 0                                   | 0%              |
|     | WEA                                         | 2  | 20% SPEC         |         | 0                                   | 0%              | 0                                   | 0%              | 0                                   | 0%              | 0                                   | 0%              |
|     | Altholz                                     | 2  | 20% SPEC         |         | 0                                   | 0%              | 0                                   | 0%              | 0                                   | 0%              | 0                                   | 0%              |
|     | Pellets                                     | 4  | 40% SPEC         |         | 0                                   | 0%              | 0                                   | 0%              | 0                                   | 0%              | 0                                   | 0%              |
|     | Waldrestholz                                | 2  | 20% SPEC         |         | 0                                   | 0%              | 0                                   | 0%              | 0                                   | 0%              | 0                                   | 0%              |
|     | Energiepflanzen Biogas                      | 2  | 20% SPEC         |         | 0                                   | 0%              | 0                                   | 0%              | 0                                   | 0%              | 0                                   | 0%              |
|     | Energiepflanzen Biomethan                   | 3  | 30% SPEC         |         | 0                                   | 0%              | 0                                   | 0%              | 0                                   | 0%              | 0                                   | 0%              |
|     | Pumpspeicherkraftwerk                       | 3  | 30% SPEC         |         | 0                                   | 0%              | 0                                   | 0%              | 0                                   | 0%              | 0                                   | 0%              |
|     | Lageenergiespeicher                         | 6  | 60% SPEC         |         | 0                                   | 0%              | 0                                   | 0%              | 0                                   | 0%              | 0                                   | 0%              |
|     | Druckluftspeicher                           | 5  | 50% SPEC         |         | 0                                   | 0%              | 0                                   | 0%              | 0                                   | 0%              | 0                                   | 0%              |
|     | Batteriespeicher                            | 7  | 70% SPEC         |         | 0                                   | 0%              | 0                                   | 0%              | 0                                   | 0%              | 0                                   | 0%              |
|     | Redox-Flow-Batteriespeicher                 | 10 | 100% SPEC        |         | 0                                   | 0%              | 0                                   | 0%              | 0                                   | 0%              | 0                                   | 0%              |
|     | Wasserstoffspeicher                         | 9  | 90% SPEC         |         | 0                                   | 0%              | 0                                   | 0%              | 0                                   | 0%              | 0                                   | 0%              |
|     | Gasspeicher                                 | 6  | 60% SPEC         |         | 0                                   | 0%              | 0                                   | 0%              | 0                                   | 0%              | 0                                   | 0%              |
|     |                                             |    | VAL              | E2      | 0%                                  | 0%              | 0%                                  | 0%              | 0%                                  | 0%              | 0%                                  | 0%              |
|     |                                             |    | VAL              | J8      | keine Angabe                        |                 | keine Angabe                        |                 | keine Angabe                        |                 | keine Angabe                        |                 |
| F2  | Technisches System                          |    |                  |         | 0%                                  | 0%              | 0%                                  | 0%              | 0%                                  | 0%              | 0%                                  | 0%              |
|     | Batteriespeicher                            | 3  | 16% SPEC         |         | 0                                   | 0%              | 0                                   | 0%              | 0                                   | 0%              | 0                                   | 0%              |
|     | Wasserstoffspeicher                         | 4  | 21% SPEC         |         | 0                                   | 0%              | 0                                   | 0%              | 0                                   | 0%              | 0                                   | 0%              |
|     | Redox-Flow-Speicher                         | 5  | 26% SPEC         |         | 0                                   | 0%              | 0                                   | 0%              | 0                                   | 0%              | 0                                   | 0%              |
|     | E-Flotte                                    | 4  | 21% VAL          | J10     | FALSCH                              | 0%              | FALSCH                              | 0%              | FALSCH                              | 0%              | FALSCH                              | 0%              |
|     | Smartes System                              | 3  | 16% VAL          | J9      | FALSCH                              | 0%              | FALSCH                              | 0%              | FALSCH                              | 0%              | FALSCH                              | 0%              |
|     |                                             | 19 | 100%             |         | 0%                                  | 0%              | 0%                                  | 0%              | 0%                                  | 0%              | 0%                                  | 0%              |
| F3  | Vermarktungsform                            |    |                  |         | 30%                                 | 30%             | 30%                                 | 30%             | 30%                                 | 30%             | 30%                                 | 30%             |
|     | Einspeisung nach EEG                        | 3  | 30%              |         |                                     |                 |                                     |                 |                                     |                 |                                     |                 |
|     | Eigenverbrauch                              | 3  | 30%              |         |                                     |                 |                                     |                 |                                     |                 |                                     |                 |
|     | EEG-Gefördert mit Regionalnachweisen        | 5  | 50%              |         |                                     |                 |                                     |                 |                                     |                 |                                     |                 |
|     | Eigenverbrauch/EEG-Gefördert                | 4  | 40%              |         |                                     |                 |                                     |                 |                                     |                 |                                     |                 |
|     | Eigenverbrauch/Direktvermarktung            | 5  | 50%              |         |                                     |                 |                                     |                 |                                     |                 |                                     |                 |
|     | Direktvermarktung                           | 5  | 50%              |         |                                     |                 |                                     |                 |                                     |                 |                                     |                 |
|     | Direktvermarktung + Regelleistung           | 6  | 60%              |         |                                     |                 |                                     |                 |                                     |                 |                                     |                 |
|     | PPA                                         | 7  | 70%              |         |                                     |                 |                                     |                 |                                     |                 |                                     |                 |
|     |                                             |    | VAL              | J13     | Einspeisung nach EEG                | 30%             |
| F4  | Geschäftsmodell                             |    |                  |         | 50%                                 | 50%             | 50%                                 | 50%             | 50%                                 | 50%             | 50%                                 | 50%             |
|     | -                                           | 0  | 0%               |         |                                     |                 |                                     |                 |                                     |                 |                                     |                 |
|     | Innovator                                   | 10 | 100%             |         |                                     |                 |                                     |                 |                                     |                 |                                     |                 |
|     | Früher Übernehmer                           | 9  | 90%              |         |                                     |                 |                                     |                 |                                     |                 |                                     |                 |
|     | Frühe Mehrheit                              | 8  | 80%              |         |                                     |                 |                                     |                 |                                     |                 |                                     |                 |
|     | Späte Mehrheit                              | 5  | 50%              |         |                                     |                 |                                     |                 |                                     |                 |                                     |                 |
|     | Nachzügler                                  | 1  | 10%              |         |                                     |                 |                                     |                 |                                     |                 |                                     |                 |
|     |                                             |    | VAL              | J14     | Späte Mehrheit                      | 50%             |
| F5  | Betreiber bzw. Hersteller                   |    |                  |         | 50%                                 | 50%             | 50%                                 | 50%             | 50%                                 | 50%             | 50%                                 | 50%             |
|     | Kriterium                                   |    | Bewertung Nutzen |         |                                     |                 |                                     |                 |                                     |                 |                                     |                 |
|     | Innovator                                   | 10 | 100%             |         |                                     |                 |                                     |                 |                                     |                 |                                     |                 |
|     | Früher Übernehmer                           | 9  | 90%              |         |                                     |                 |                                     |                 |                                     |                 |                                     |                 |
|     | Frühe Mehrheit                              | 8  | 80%              |         |                                     |                 |                                     |                 |                                     |                 |                                     |                 |
|     | Späte Mehrheit                              | 5  | 50%              |         |                                     |                 |                                     |                 |                                     |                 |                                     |                 |
|     | Nachzügler                                  | 1  | 10%              |         |                                     |                 |                                     |                 |                                     |                 |                                     |                 |
|     |                                             |    | VAL              | J14     | Späte Mehrheit                      | 50%             |
| G   | Wertschöpfung                               |    |                  |         | 92%                                 | 92%             | 92%                                 | 92%             | 48%                                 | 48%             | 48%                                 | 48%             |
|     | Projektwertschöpfung                        |    | VAL              | D10     |                                     |                 |                                     |                 |                                     |                 |                                     |                 |
|     | Projektwertschöpfung über 20a               |    | SPEC             |         | 1.167.859,00 €                      | 23.357.180,00 € | 1.167.859,00 €                      | 23.357.180,00 € | 463.461,00 €                        | 9.269.220,00 €  | 463.461,00 €                        | 9.269.220,00 €  |
|     | Referenzwertschöpfung über 20a              |    | REF              |         | 29.460.000,00 €                     | 29.460.000,00 € | 29.460.000,00 €                     | 29.460.000,00 € | 29.460.000,00 €                     | 29.460.000,00 € | 29.460.000,00 €                     | 29.460.000,00 € |
|     | Relativer Anteil und Nutzwert               |    | Nutzwert         | 04. Mai | 79%                                 | 92%             | 79%                                 | 92%             | 31%                                 | 48%             | 31%                                 | 48%             |
| H   | Unabhängigkeit                              |    |                  |         | 34%                                 | 34%             | 34%                                 | 34%             | 27%                                 | 27%             | 27%                                 | 27%             |
|     | Rekommunalisiert                            | 3  | 14% VAL          | N8      | FALSCH                              | 0%              | FALSCH                              | 0%              | FALSCH                              | 0%              | FALSCH                              | 0%              |
|     | Regionalstrom                               | 2  | 10% VAL          | N9      | FALSCH                              | 0%              | FALSCH                              | 0%              | FALSCH                              | 0%              | FALSCH                              | 0%              |
|     | Energieautarkie                             | 10 | 48% CALC         | H1      | 71%                                 | 34%             | 71%                                 | 34%             | 57%                                 | 27%             | 57%                                 | 27%             |
|     | Rechtsform des Betreibers                   | 3  | 14% CALC         | H2      | 0%                                  | 0%              | 0%                                  | 0%              | 0%                                  | 0%              | 0%                                  | 0%              |
|     | Bürgerprojektbeteiligung                    | 3  | 14% CALC         | H3      | 0%                                  | 0%              | 3%                                  | 34%             | 0%                                  | 0%              | 3%                                  | 28%             |
|     |                                             | 21 | 100%             |         | 34%                                 | 34%             | 34%                                 | 34%             | 27%                                 | 27%             | 27%                                 | 27%             |
| H1  | Energieautarkie                             |    |                  |         | 71%                                 | 71%             | 71%                                 | 71%             | 57%                                 | 57%             | 57%                                 | 57%             |
|     | Inselbetrieb                                | 1  | 5% VAL           | N10     | FALSCH                              | 0%              | FALSCH                              | 0%              | FALSCH                              | 0%              | FALSCH                              | 0%              |
|     | Lokale Finanzierung                         | 5  | 26% CALC         | H11     | 100%                                | 26%             | 100%                                | 26%             | 100%                                | 26%             | 100%                                | 26%             |
|     | Anteil EE                                   | 10 | 53% VAL          | N11     | 80%                                 | 42%             | 80%                                 | 42%             | 53%                                 | 28%             | 53%                                 | 28%             |
|     | Vermarktungsform                            | 3  | 16% CALC         | H12     | 20%                                 | 3%              | 20%                                 | 3%              | 20%                                 | 3%              | 20%                                 | 3%              |
|     |                                             | 19 | 100%             |         | 71%                                 | 71%             | 71%                                 | 71%             | 57%                                 | 57%             | 57%                                 | 57%             |
| H11 | Lokale Finanzierung                         |    |                  |         | 100%                                | 100%            | 100%                                | 100%            | 100%                                | 100%            | 100%                                | 100%            |
|     | 0 - 33                                      | 0  | 0%               |         |                                     |                 |                                     |                 |                                     |                 |                                     |                 |
|     | 33 - 66                                     | 4  | 40%              |         |                                     |                 |                                     |                 |                                     |                 |                                     |                 |
|     | 66 - 100                                    | 7  | 70%              |         |                                     |                 |                                     |                 |                                     |                 |                                     |                 |
|     |                                             | 10 | 100%             |         |                                     |                 |                                     |                 |                                     |                 |                                     |                 |
|     |                                             |    | VAL              | N14     | 66 - 100                            | 100%            | 66 - 100                            | 100%            | 66 - 100                            | 100%            | 66 - 100                            | 100%            |
| H12 | Vermarktungsform                            |    |                  |         | 20%                                 | 20%             | 20%                                 | 20%             | 20%                                 | 20%             | 20%                                 | 20%             |
|     | Eigenbedarfsabdeckung                       | 10 | 100%             |         |                                     |                 |                                     |                 |                                     |                 |                                     |                 |
|     | Einspeisung nach EEG                        | 2  | 20%              |         |                                     |                 |                                     |                 |                                     |                 |                                     |                 |
|     | Einspeisung nach EEG mit Regionalnachweisen | 5  | 50%              |         |                                     |                 |                                     |                 |                                     |                 |                                     |                 |
|     | Direktvermarktung                           | 7  | 70%              |         |                                     |                 |                                     |                 |                                     |                 |                                     |                 |
|     |                                             |    | VAL              | N12     | Einspeisung nach EEG                | 20%             |
| H2  | Rechtsform                                  |    |                  |         | 0%                                  | 0%              | 0%                                  | 0%              | 0%                                  | 0%              | 0%                                  | 0%              |
|     | keine Angabe                                | 0  | 0%               |         |                                     |                 |                                     |                 |                                     |                 |                                     |                 |
|     | AG                                          | 1  | 10%              |         |                                     |                 |                                     |                 |                                     |                 |                                     |                 |
|     | GmbH                                        | 4  | 40%              |         |                                     |                 |                                     |                 |                                     |                 |                                     |                 |
|     | UG                                          | 5  | 50%              |         |                                     |                 |                                     |                 |                                     |                 |                                     |                 |
|     | GbR                                         | 3  | 30%              |         |                                     |                 |                                     |                 |                                     |                 |                                     |                 |
|     | Einzelfirma                                 | 3  | 30%              |         |                                     |                 |                                     |                 |                                     |                 |                                     |                 |
|     | e.V.                                        | 6  | 60%              |         |                                     |                 |                                     |                 |                                     |                 |                                     |                 |
|     | GmbH & Co KG                                | 6  | 60%              |         |                                     |                 |                                     |                 |                                     |                 |                                     |                 |
|     | eG                                          | 10 | 100%             |         |                                     |                 |                                     |                 |                                     |                 |                                     |                 |
|     |                                             |    | VAL              | D11     | keine Angabe                        | 0%              |
| H3  | Bürgerprojektbeteiligung                    |    |                  |         | 0%                                  | 3%              | 0%                                  | 3%              | 0%                                  | 3%              | 0%                                  | 3%              |
|     | Information                                 | 1  | 5% CALC          | B11     | 0%                                  | 0%              | 44%                                 | 2%              | 0%                                  | 0%              | 44%                                 | 2%              |
|     | Dialog                                      | 1  | 5% CALC          | B12     | 0%                                  | 0%              | 0%                                  | 0%              | 0%                                  | 0%              | 0%                                  | 0%              |
|     | Mitbestimmung                               | 1  | 5% CALC          | B13     | 0%                                  | 0%              | 23%                                 | 1%              | 0%                                  | 0%              | 23%                                 | 1%              |
|     | Direkte finanzielle Beteiligung             | 10 | 48% CALC         | B14     | 0%                                  | 0%              | 0%                                  | 0%              | 0%                                  | 0%              | 0%                                  | 0%              |
|     | Passive finanzielle Beteiligung             | 8  | 38% CALC         | B15     | 0%                                  | 0%              | 0%                                  | 0%              | 0%                                  | 0%              | 0%                                  | 0%              |
|     |                                             | 21 | 100%             |         | 0%                                  | 0%              | 0%                                  | 3%              | 0%                                  | 0%              | 0%                                  | 3%              |
| I   | Imageverbesserung                           |    |                  |         | 0%                                  | 0%              | 0%                                  | 0%              | 0%                                  | 0%              | 0%                                  | 0%              |
|     | Gewerbe/Dienstleistungen/Industrie          | 5  | 33% VAL          | P9      | FALSCH                              | 0%              | FALSCH                              | 0%              | FALSCH                              | 0%              | FALSCH                              | 0%              |
|     | Tourismus                                   | 5  | 33% VAL          | P10     | FALSCH                              | 0%              | FALSCH                              | 0%              | FALSCH                              | 0%              | FALSCH                              | 0%              |
|     | Zuzug                                       | 5  | 33% VAL          | P8      | FALSCH                              | 0%              | FALSCH                              | 0%              | FALSCH                              | 0%              | FALSCH                              | 0%              |
|     |                                             | 15 | 100%             |         | 0%                                  | 0%              | 0%                                  | 0%              | 0%                                  | 0%              | 0%                                  | 0%              |
| J   | Organisation & Struktur                     |    |                  |         | 0%                                  | 0%              | 0%                                  | 0%              | 0%                                  | 0%              | 0%                                  | 0%              |
|     | Verwaltungsaufwand                          | 6  | 60% VAL          | R7      | FALSCH                              | 0%              | FALSCH                              | 0%              | FALSCH                              | 0%              | FALSCH                              | 0%              |
|     | Umstrukturierung                            | 4  | 40% VAL          | R8      | FALSCH                              | 0%              | FALSCH                              | 0%              | FALSCH                              | 0%              | FALSCH                              | 0%              |
|     |                                             | 10 | 100%             |         | 0%                                  | 0%              | 0%                                  | 0%              | 0%                                  | 0%              | 0%                                  | 0%              |
